# Supplementary material for: Metabolites Produced by an Endophytic Phomopsis sp. and Their Anti-TMV Activity
Source: PubMed Central journal article supplement (PMC6149851; doi:10.3390/molecules22122073), 2017-11-27

## Supplementary Materials

**Title:** Metabolites Produced by an Endophytic *Phomopsis* sp. and Their Anti-TMV Activity

**Author(s):** Qing-Wei Tan \*, Pei-Hua Fang, Jian-Cheng Ni, Fangluan Gao and Qi-Jian Chen \*

- S1. <sup>1</sup>H-NMR spectrum (400 MHz) of Dothiorelone A (1) in CD<sub>3</sub>OD.
- S2. <sup>13</sup>C-NMR spectrum (100 MHz) of Dothiorelone A (1) in CD<sub>3</sub>OD.
- S3. <sup>1</sup>H-NMR spectrum (400 MHz) of Dothiorelone B (2) in CD<sub>3</sub>OD.
- S4. <sup>13</sup>C-NMR spectrum (100 MHz) of Dothiorelone B (2) in CD<sub>3</sub>OD.
- S5. <sup>1</sup>H-NMR spectrum (400 MHz) of Dothiorelone C (3) in CD<sub>3</sub>OD.
- S6. <sup>13</sup>C-NMR spectrum (100 MHz) of Dothiorelone C (3) in CD<sub>3</sub>OD.
- S7. <sup>1</sup>H-NMR spectrum (500 MHz) of Dothiorelone H (4) in CD<sub>3</sub>OD.
- S8. <sup>13</sup>C-NMR spectrum (125 MHz) of Dothiorelone H (4) in CD<sub>3</sub>OD.
- S9. <sup>1</sup>H-NMR spectrum (500 MHz) of Cytosporone C (5) in CD<sub>3</sub>OD.
- S10. <sup>13</sup>C-NMR spectrum (125 MHz) of Cytosporone C (5) in CD<sub>3</sub>OD.
- S11. <sup>1</sup>H-NMR spectrum (500 MHz) of Cytosporone U (6) in CD<sub>3</sub>OD.
- S12. <sup>13</sup>C-NMR spectrum (125 MHz) of Cytosporone U (6) in CD<sub>3</sub>OD.
- S13. <sup>1</sup>H-NMR spectrum (500 MHz) of the purified polysaccharide in D<sub>2</sub>O.
- S14. <sup>13</sup>C-NMR spectrum (125 MHz) of the purified polysaccharide in D<sub>2</sub>O.
- S15. HSQC spectrum of the purified polysaccharide.
- S16. TOSCY spectrum of the purified polysaccharide.
- S17. NOESY spectrum of the purified polysaccharide.

## S1. <sup>1</sup>H-NMR spectrum (400 MHz) of Dothiorelone A (1) in CD<sub>3</sub>OD.

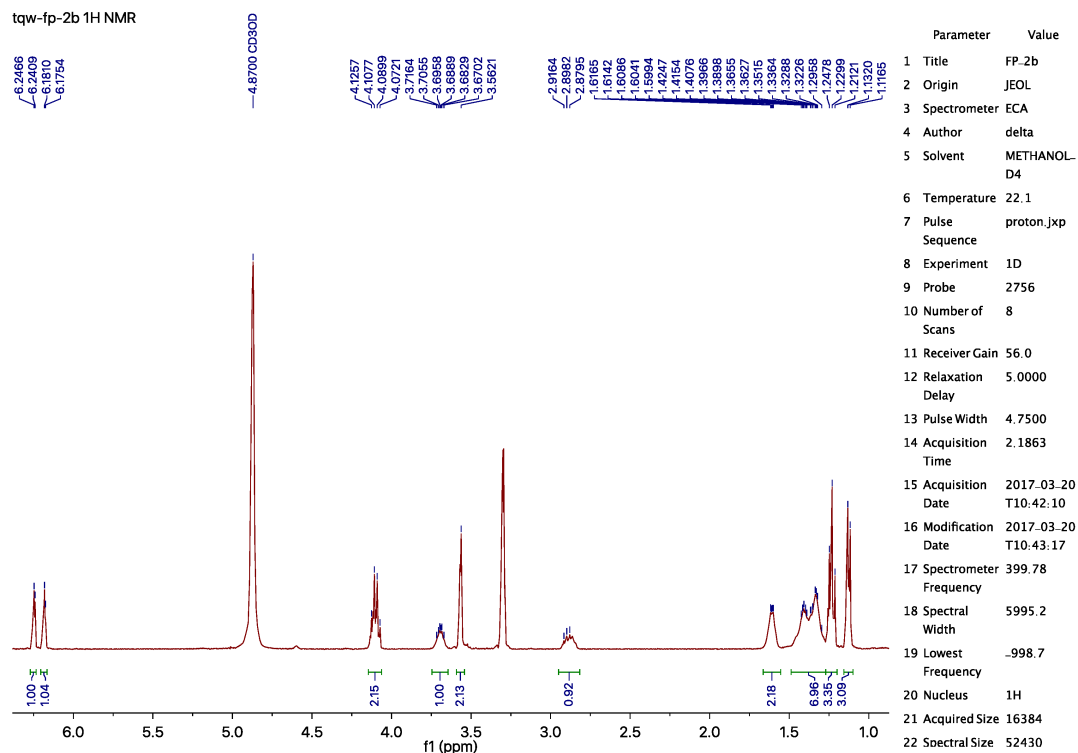

## S2. <sup>13</sup>C-NMR spectrum (100 MHz) of Dothiorelone A (1) in CD<sub>3</sub>OD.

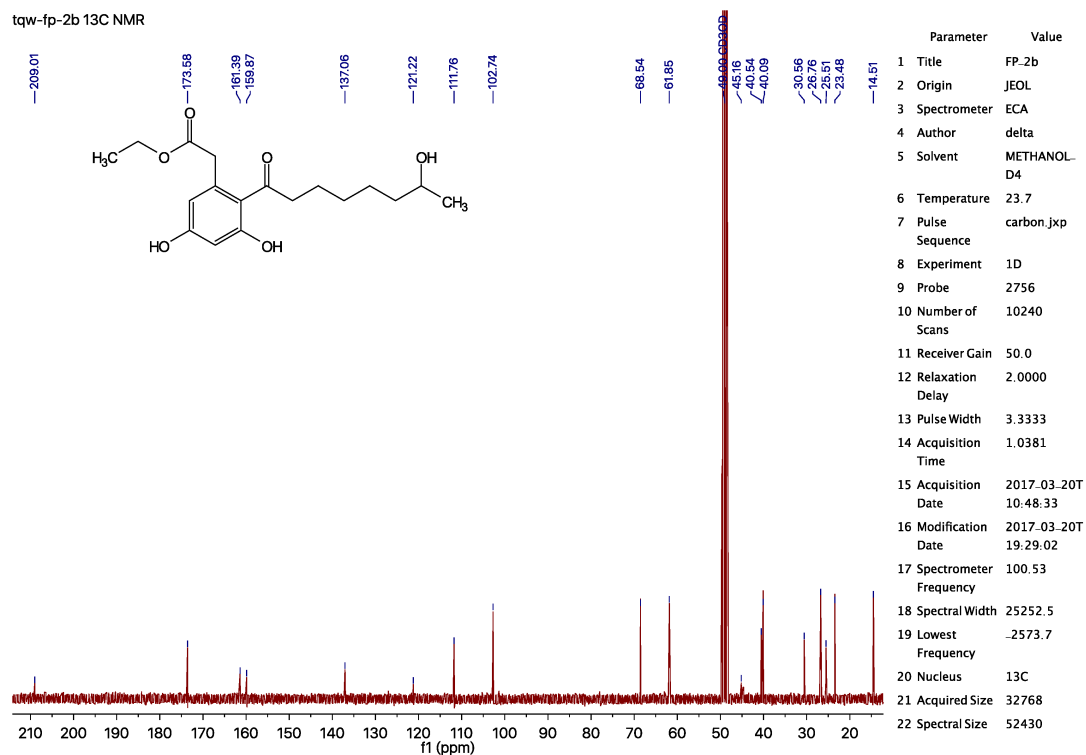

### S3. <sup>1</sup>H-NMR spectrum (400 MHz) of Dothiorelone A (1) in CD<sub>3</sub>OD.

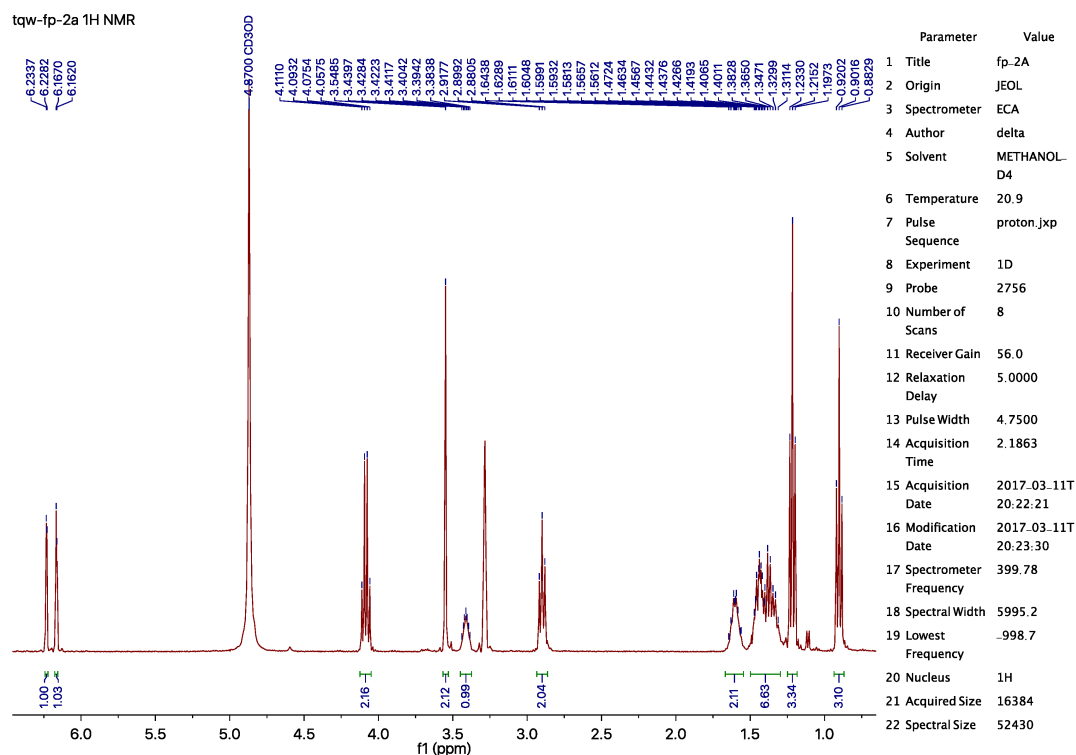

### S4. <sup>13</sup>C-NMR spectrum (100 MHz) of Dothiorelone A (1) in CD<sub>3</sub>OD.

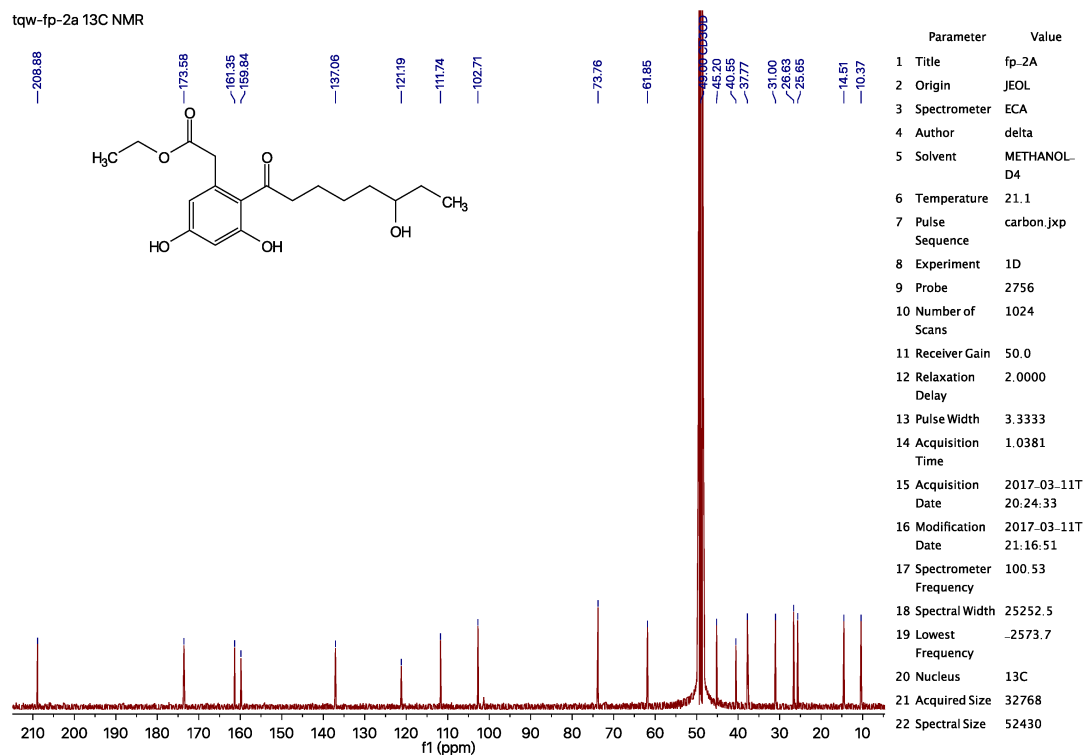

### S5. <sup>1</sup>H-NMR spectrum (400 MHz) of Dothiorelone C (3) in CD<sub>3</sub>OD.

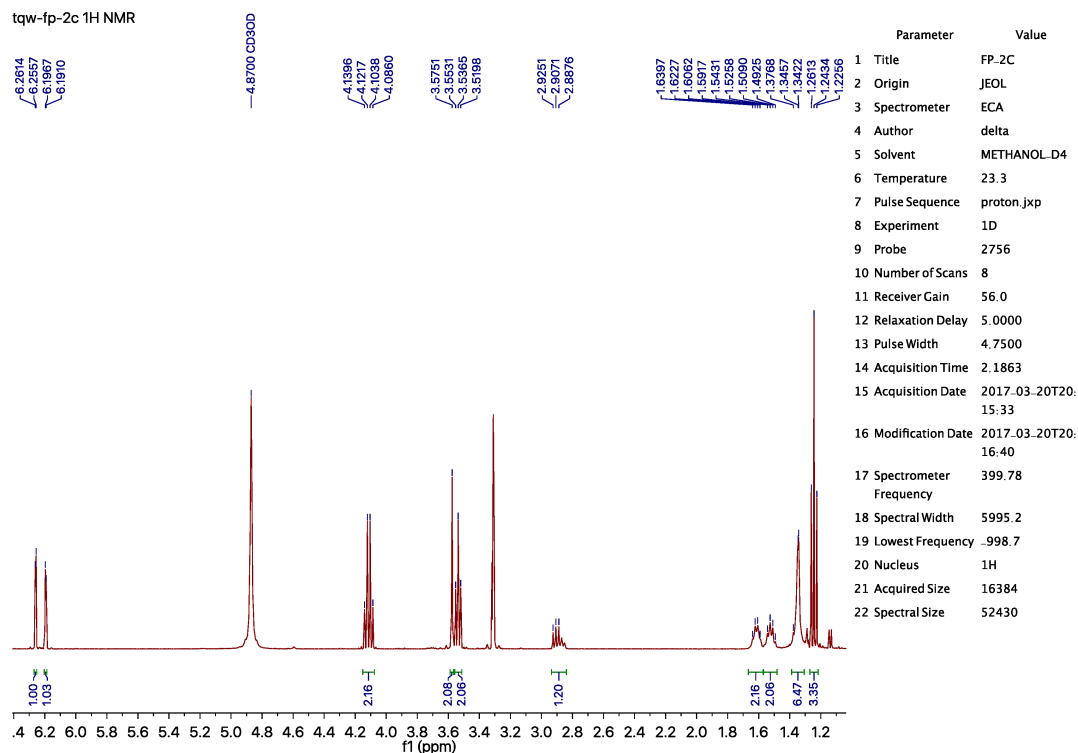

### S6. <sup>13</sup>C-NMR spectrum (100 MHz) of Dothiorelone C (3) in CD<sub>3</sub>OD.

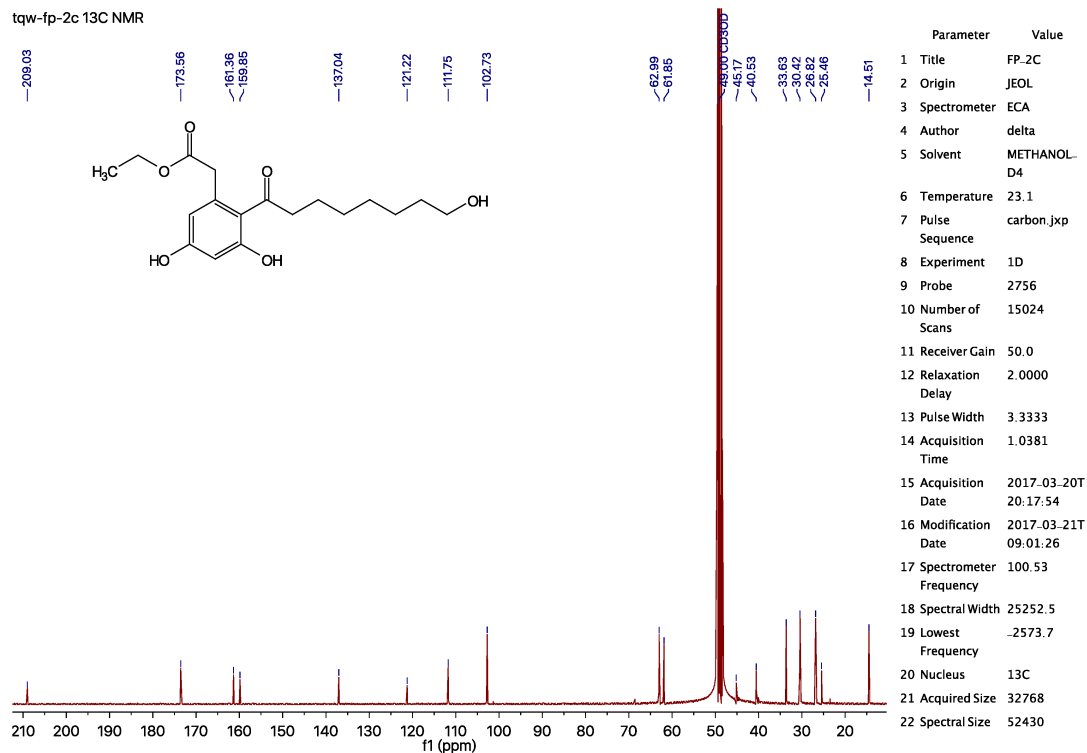

### S7. <sup>1</sup>H-NMR spectrum (500 MHz) of Dothiorelone H (4) in CD<sub>3</sub>OD.

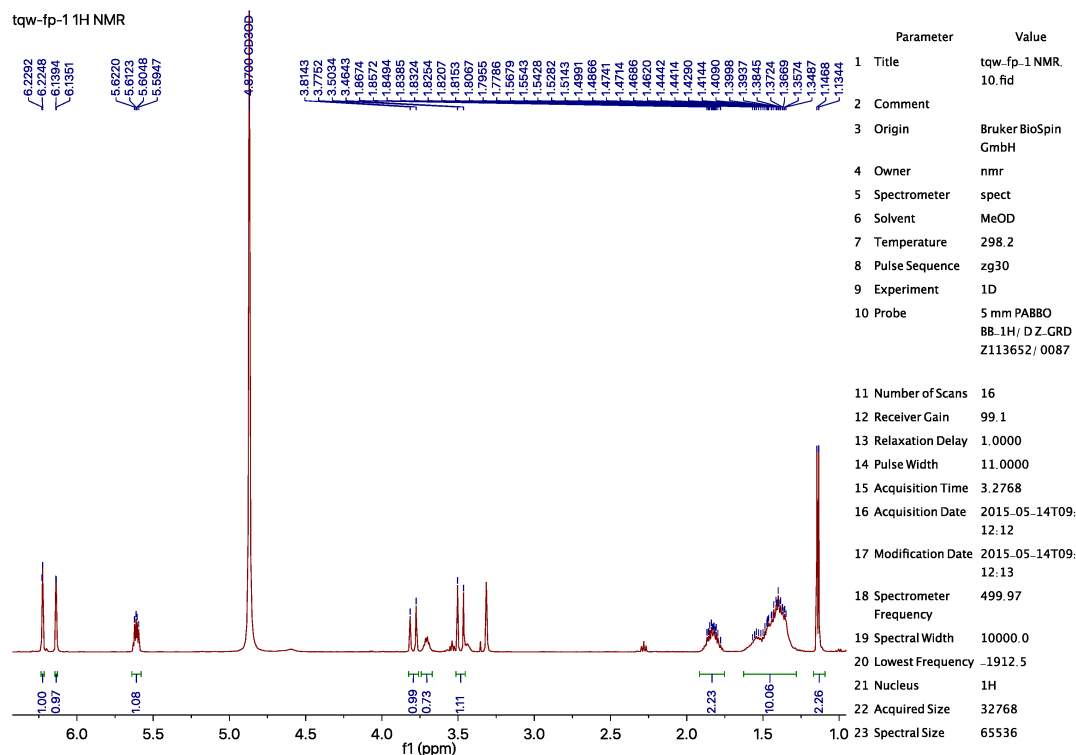

### S8. <sup>13</sup>C-NMR spectrum (125 MHz) of Dothiorelone H (4) in CD<sub>3</sub>OD.

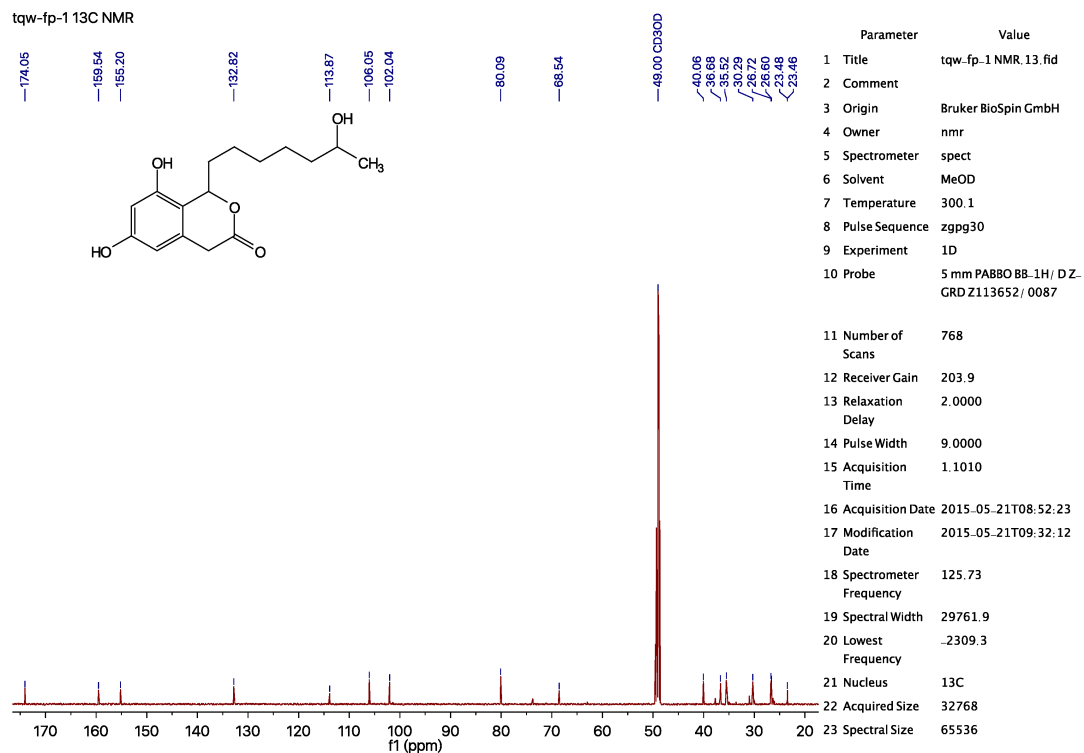

### S9. <sup>1</sup>H-NMR spectrum (500 MHz) of Cytosporone C (5) in CD<sub>3</sub>OD.

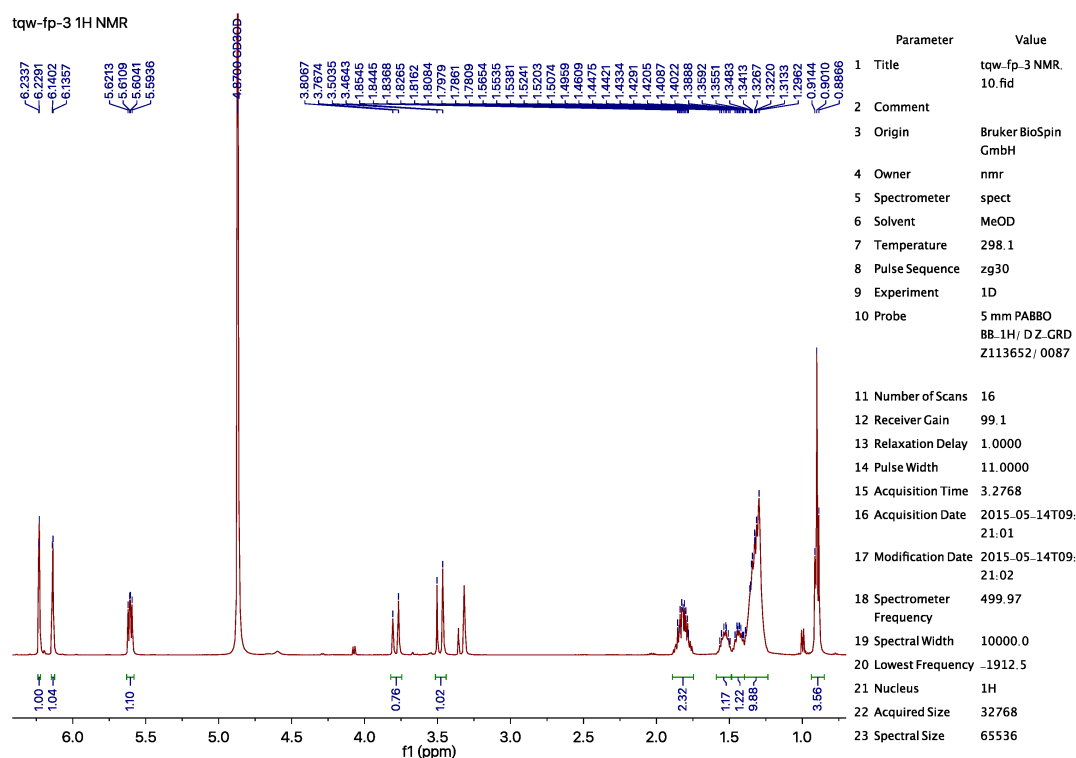

### S10. <sup>13</sup>C-NMR spectrum (125 MHz) of Cytosporone C (5) in CD<sub>3</sub>OD.

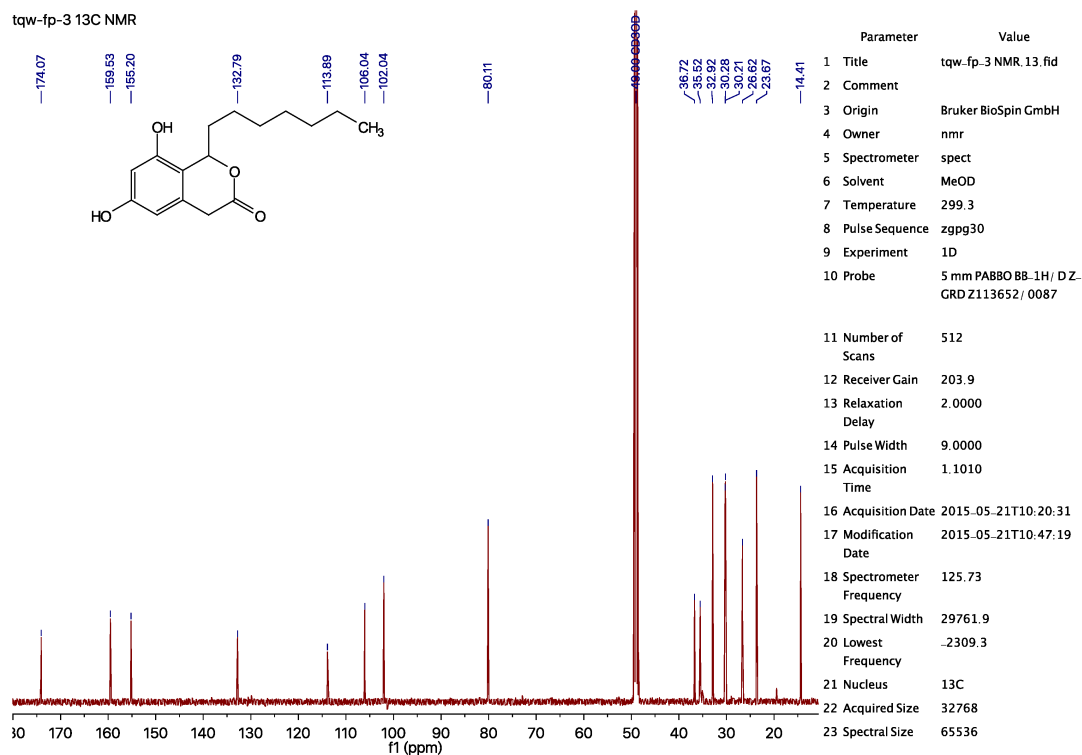

### S11. <sup>1</sup>H-NMR spectrum (500 MHz) of Cytosporone U (6) in CD<sub>3</sub>OD.

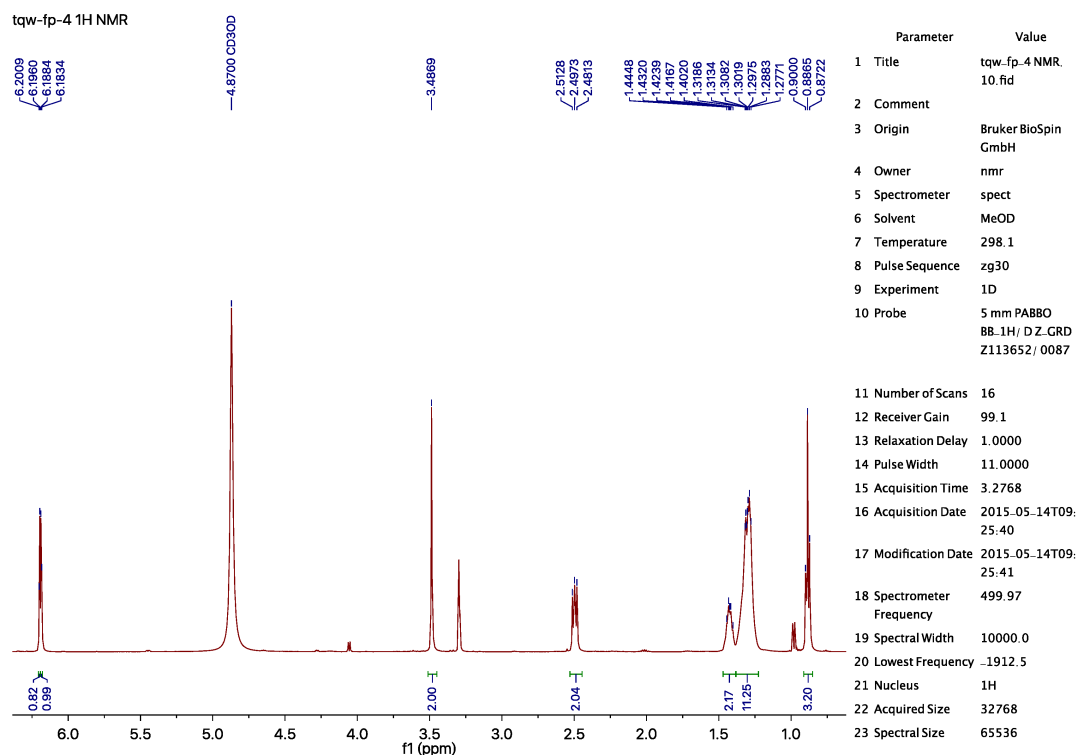

### S12. <sup>13</sup>C-NMR spectrum (125 MHz) of Cytosporone U (6) in CD<sub>3</sub>OD.

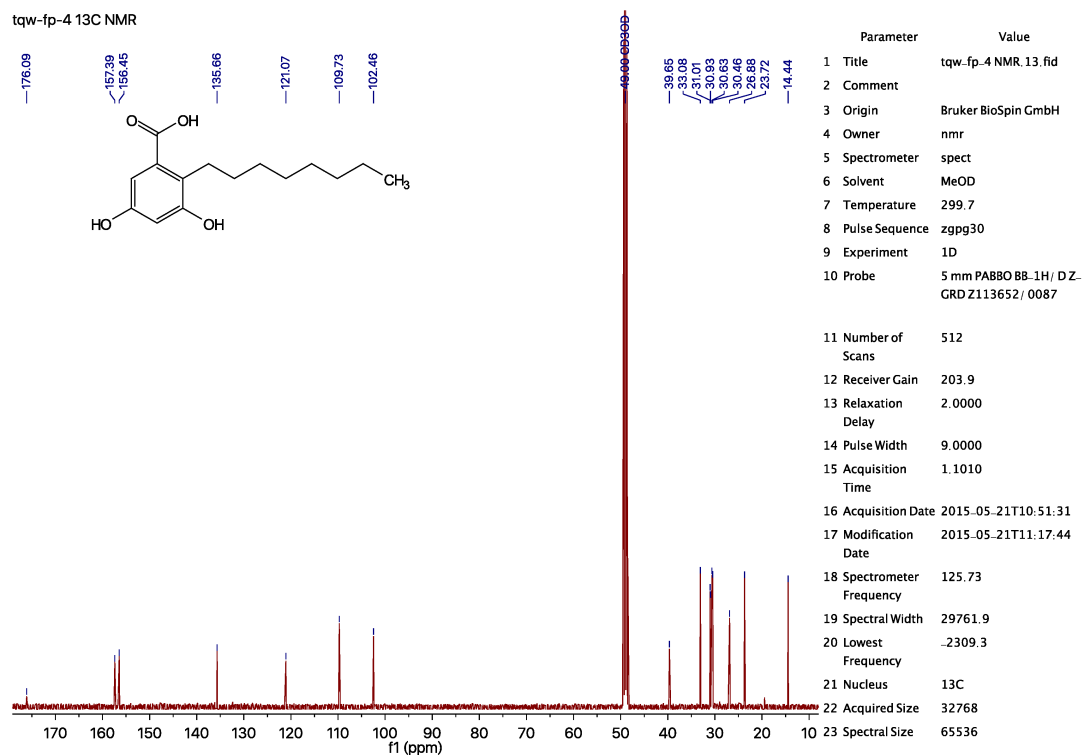

### S13. <sup>1</sup>H-NMR spectrum (500 MHz) of the purified polysaccharide in D<sub>2</sub>O.

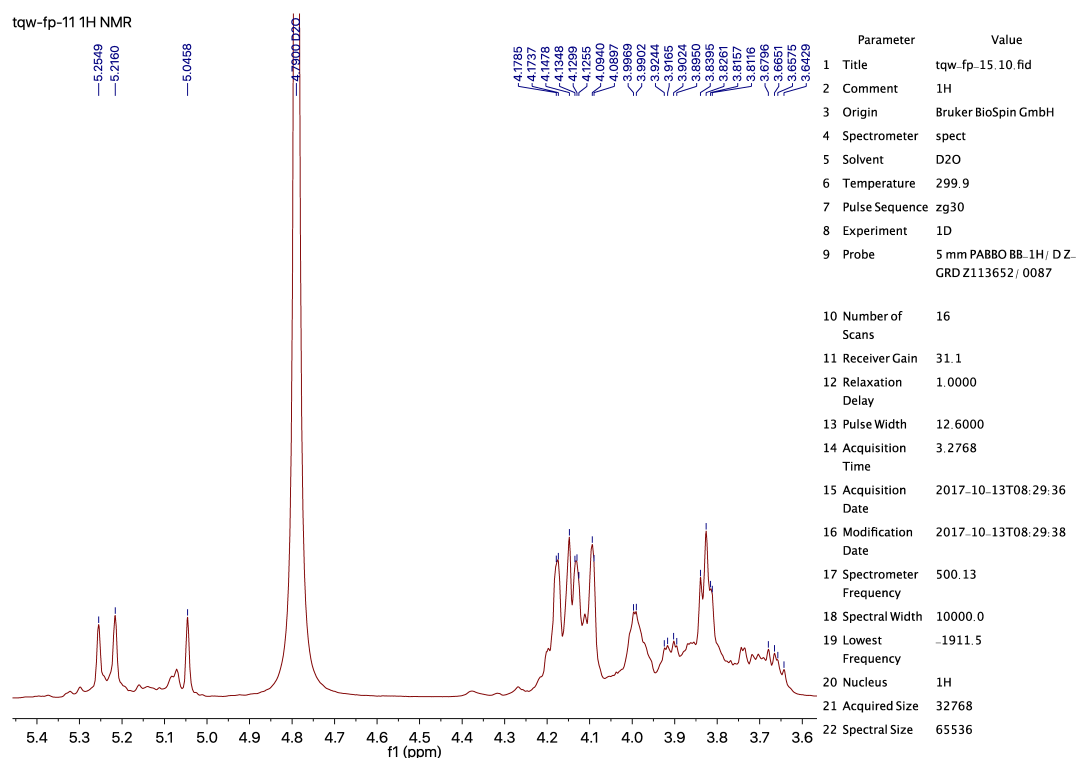

### S14. <sup>13</sup>C-NMR spectrum (125 MHz) of the purified polysaccharide in D<sub>2</sub>O.

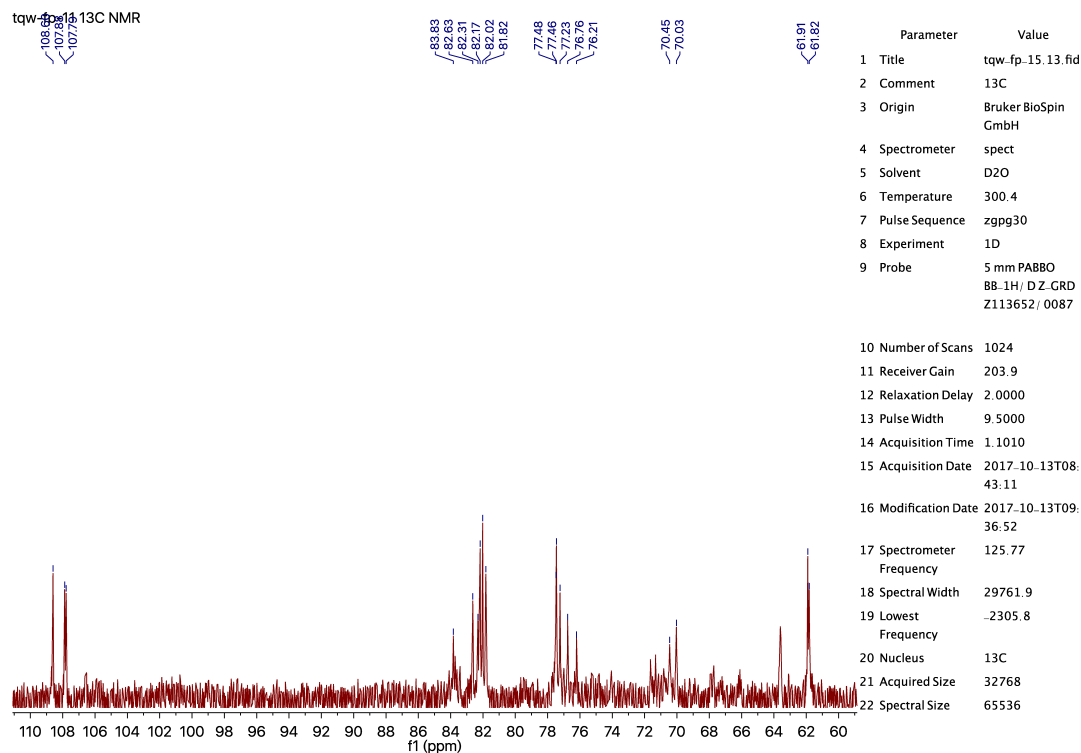



**S15. HSQC spectrum of the purified polysaccharide.**

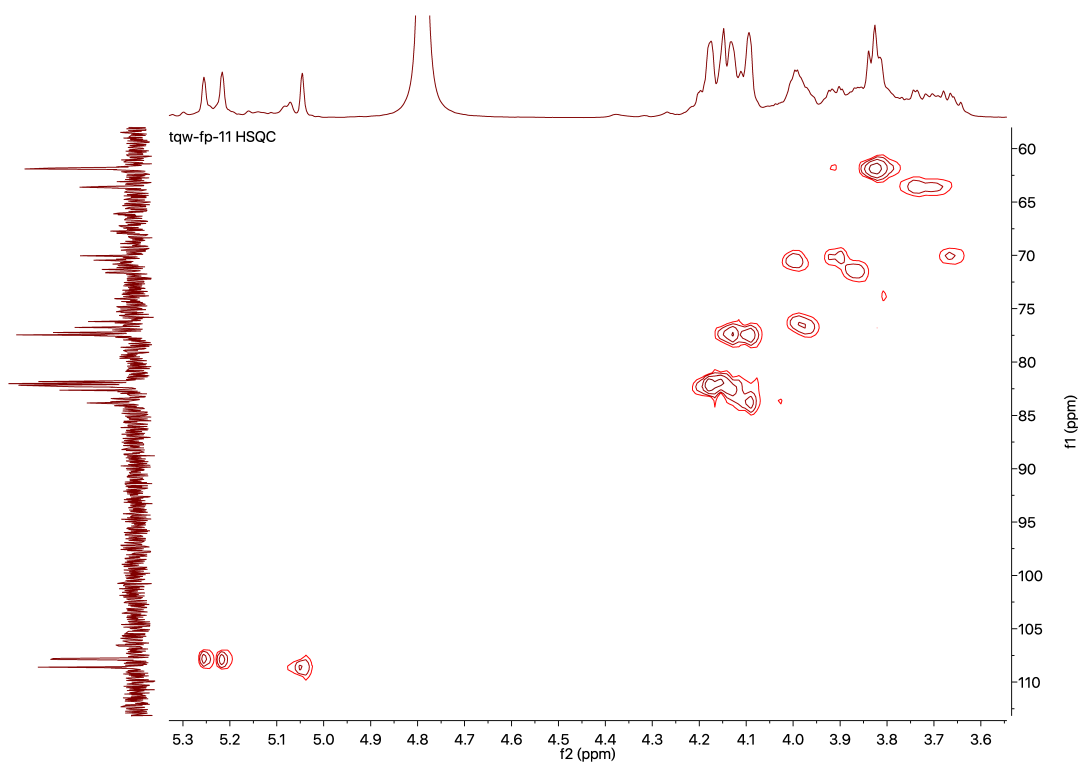

**S16. TOCSY spectrum of the purified polysaccharide.**

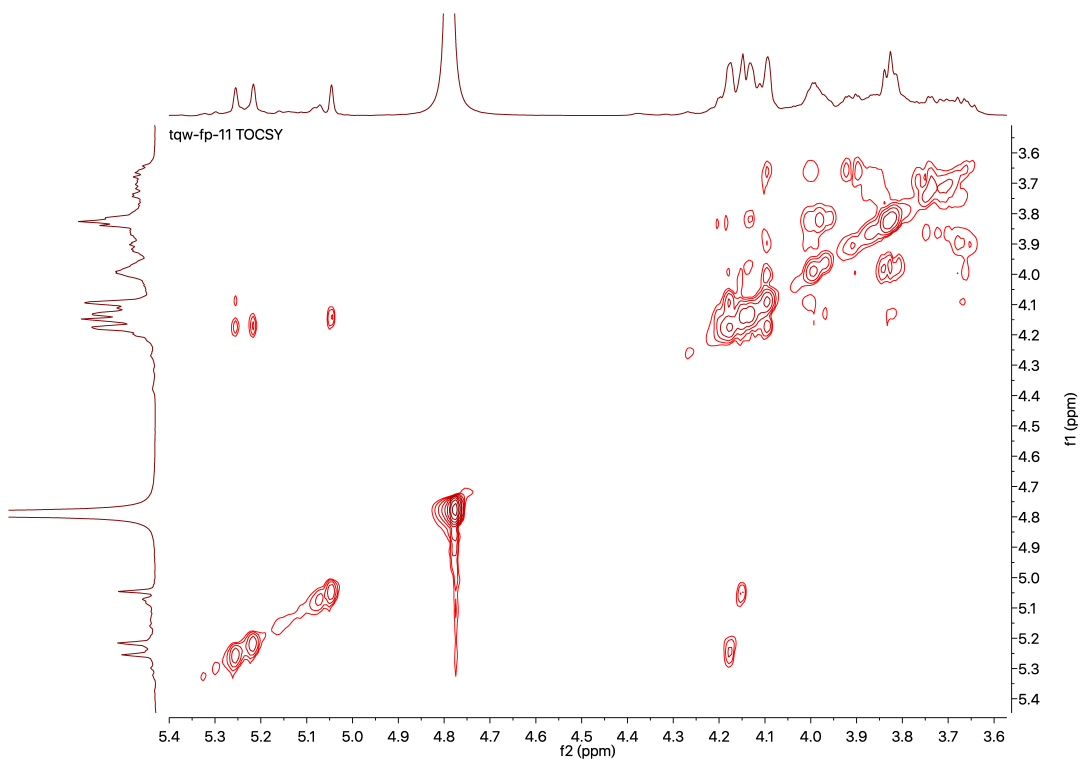

**S17. NOESY spectrum of the purified polysaccharide.**

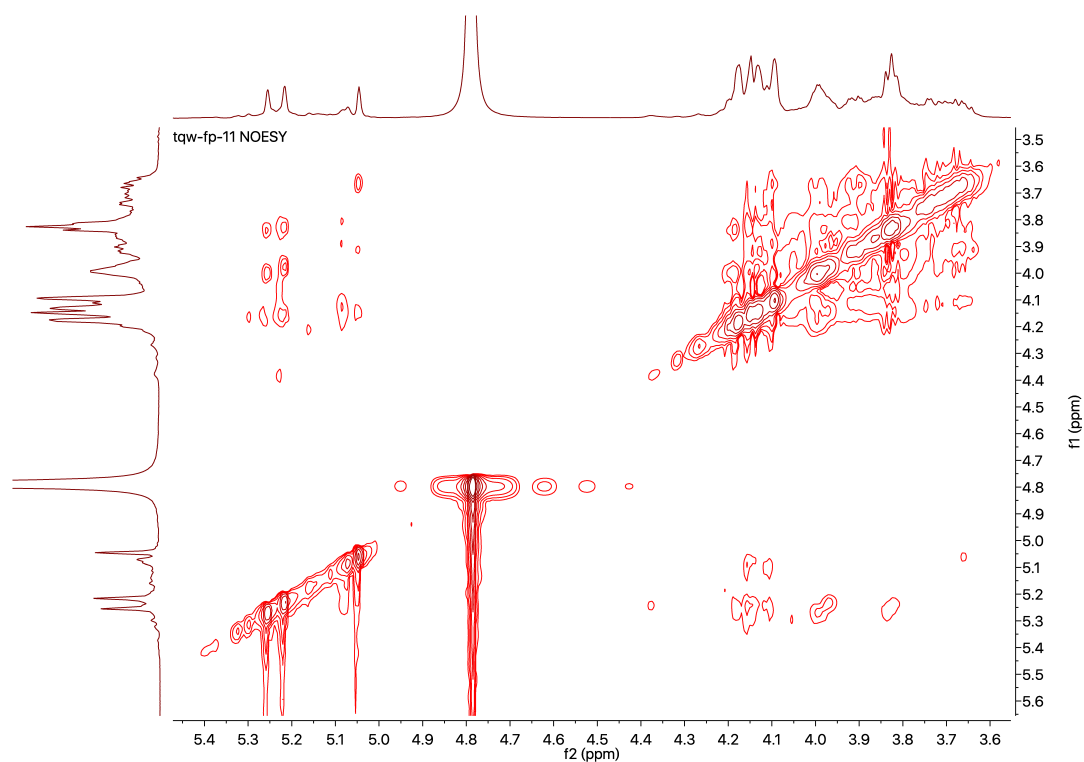

Supplement: molecules-22-02073-s001.pdf [file molecules-22-02073-s001.pdf]
